# Supplementary material for: The effect of pH on the properties of 3D welan gum–graphene oxide composite hydrogels and their excellent adsorption capacity
Source: Royal Society of Chemistry journal article supplement (doi:10.1039/c6ra18853b), 2016-01-01
Supplement: c6ra18853b1.pdf [file c6ra18853b1.pdf]

## Supporting information

### The Effect of pH on the Properties of 3D Welan Gum- Graphene Oxide Composite Hydrogels and Their Excellent Adsorption Capacity

Jianmei Jiao, Xia Xin \*, Jinglin Shen, Zhaohua Song, Zengchun Xie, Guiying Xu

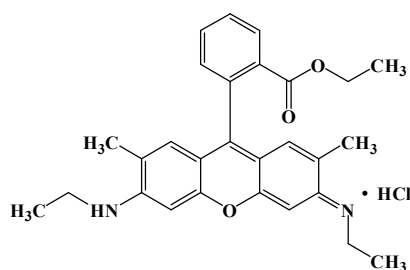

Rhodamine 6G (R6G)

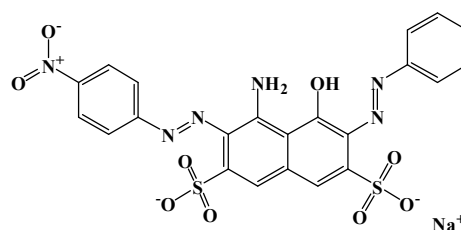

Amino black 10B (AB10B)

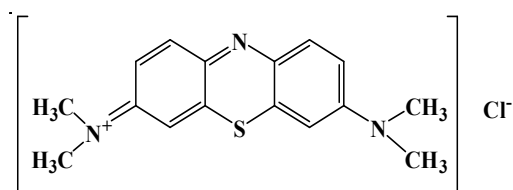

Methylene blue (MB)

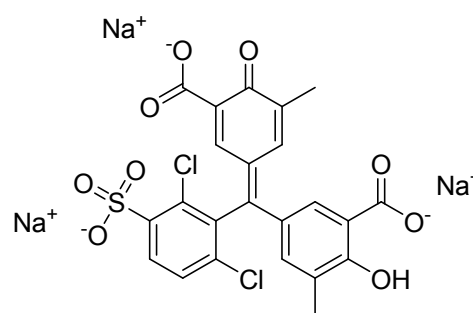

Chrome Azurol S(CAS)

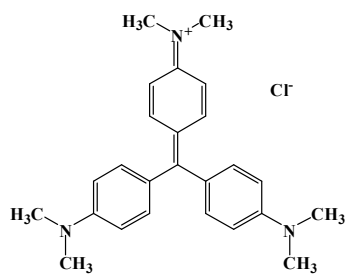

Methyl violet (MV)

**Figure S1** The chemical structures of AB10B, R6G MB, MV, and CAS.
